# Supplementary material for: Spatial Diversity in Bacterial Communities across Barren and Vegetated, Native and Invasive, Coastal Dune Microhabitats
Source: MDPI journal article supplement (doi:10.3390/d13110525), 2021-10-23
Supplement: s1 [file s1]

Archive with 1 entries (1 files):
- diversity-1425573-supplementary.pdf
